# Supplementary material for: Antioxidant Activity Level, Bioactive Compounds, Colour and Spectroscopic Analysis (UV-Vis and FT-IR) of Flavoured Drinks Made with Wine and Sour Cherries (Prunus cerasus Var. austera)
Source: MDPI journal article supplement (doi:10.3390/foods10081953), 2021-08-22
Supplement: s1 [file s1]

**Table S1.** Description of the origin of the samples.

| <b>Code</b> | <b>Commercial Name</b>       | <b>Berries</b> | <b>Location</b>      | <b>Province</b> |    |
|-------------|------------------------------|----------------|----------------------|-----------------|----|
| SCW01       | Viscioli                     | Sour cherry    | Pergola              | Pesaro-Urbino   | PU |
| SCW02       | Visciolata                   | Sour cherry    | Acqualagna           | Pesaro-Urbino   | PU |
| SCW03       | Vino & Visciole              | Sour cherry    | Cantiano             | Pesaro-Urbino   | PU |
| SCW04       | Visner 2010                  | Sour cherry    | Pergola              | Pesaro-Urbino   | PU |
| SCW05       | Visner Selezione 2010        | Sour cherry    | Pergola              | Pesaro-Urbino   | PU |
| SCW06       | Visner Selezione 2008        | Sour cherry    | Pergola              | Pesaro-Urbino   | PU |
| SCW07       | Visciola                     | Sour cherry    | Isola del Piano      | Pesaro-Urbino   | PU |
| SCW08       | Cerasus di Cantiano<br>2010  | Sour cherry    | Cantiano             | Pesaro-Urbino   | PU |
| SCW09       | Centounopercento             | Sour cherry    | Cupramontana         | Ancona          | AN |
| SCW10       | L'Orcio                      | Sour cherry    | San Marcello         | Ancona          | AN |
| SCW11       | Sicomoro                     | Sour cherry    | San Marcello         | Ancona          | AN |
| SCW12       | Visciole Velenosi            | Sour cherry    | San Marcello         | Ancona          | AN |
| SCW13       | Vino di Visc. Pozzo<br>Buono | Sour cherry    | Morro D'Alba         | Ancona          | AN |
| SCW14       | Bacco non lo sa              | Sour cherry    | Macerata             | Macerata        | MC |
| SCW15       | Vino di visciole             | Sour cherry    | Stella di Monsanpolo | Ascoli Piceno   | AP |
| BW          | Prunus                       | Blackthorn     | Pergola              | Pesaro-Urbino   | PU |
| BCL         | Ratafià                      | Black cherry   | S. Giovanni Teatino  | Chieti          | CH |
| CL          | Ratafià                      | Cherry         | Tocco da Casauria    | Pesacara        | PE |
| W01         | Arciere (Lacrime)            | Grape          | San Marcello         | Ancona          | AN |
| W02         | Ancillotto (Lacrime)         | Grape          | San Marcello         | Ancona          | AN |
| W03         | Giocoliere (Sangiovese)      | Grape          | San Marcello         | Ancona          | AN |
