# Supplementary material for: Antioxidant Activity Level, Bioactive Compounds, Colour and Spectroscopic Analysis (UV-Vis and FT-IR) of Flavoured Drinks Made with Wine and Sour Cherries (Prunus cerasus Var. austera)
Source: MDPI journal article supplement (doi:10.3390/foods10081953), 2021-08-22

**Figure S2.** Score plot (a) for the first two PCs, eigenvector (b) and eigenvalue (c) resulted from the PCA analysis performed on the UV-Vis spectra of samples diluted in acid media (Treatment “HCl”). Points are coloured depending on the province (yellow = PU; orange = AN; light grey = MC; grey = AP) and on the type of the contained berry (yellow, orange, light grey and grey = sour cherry; pink = blackthorn; violet = cherry; green = grape). Circles group SCW samples with low (red; TAA  $\leq$  18 mM TE) or high (blue; TAA  $\geq$  21 mM TE) antioxidant activity.

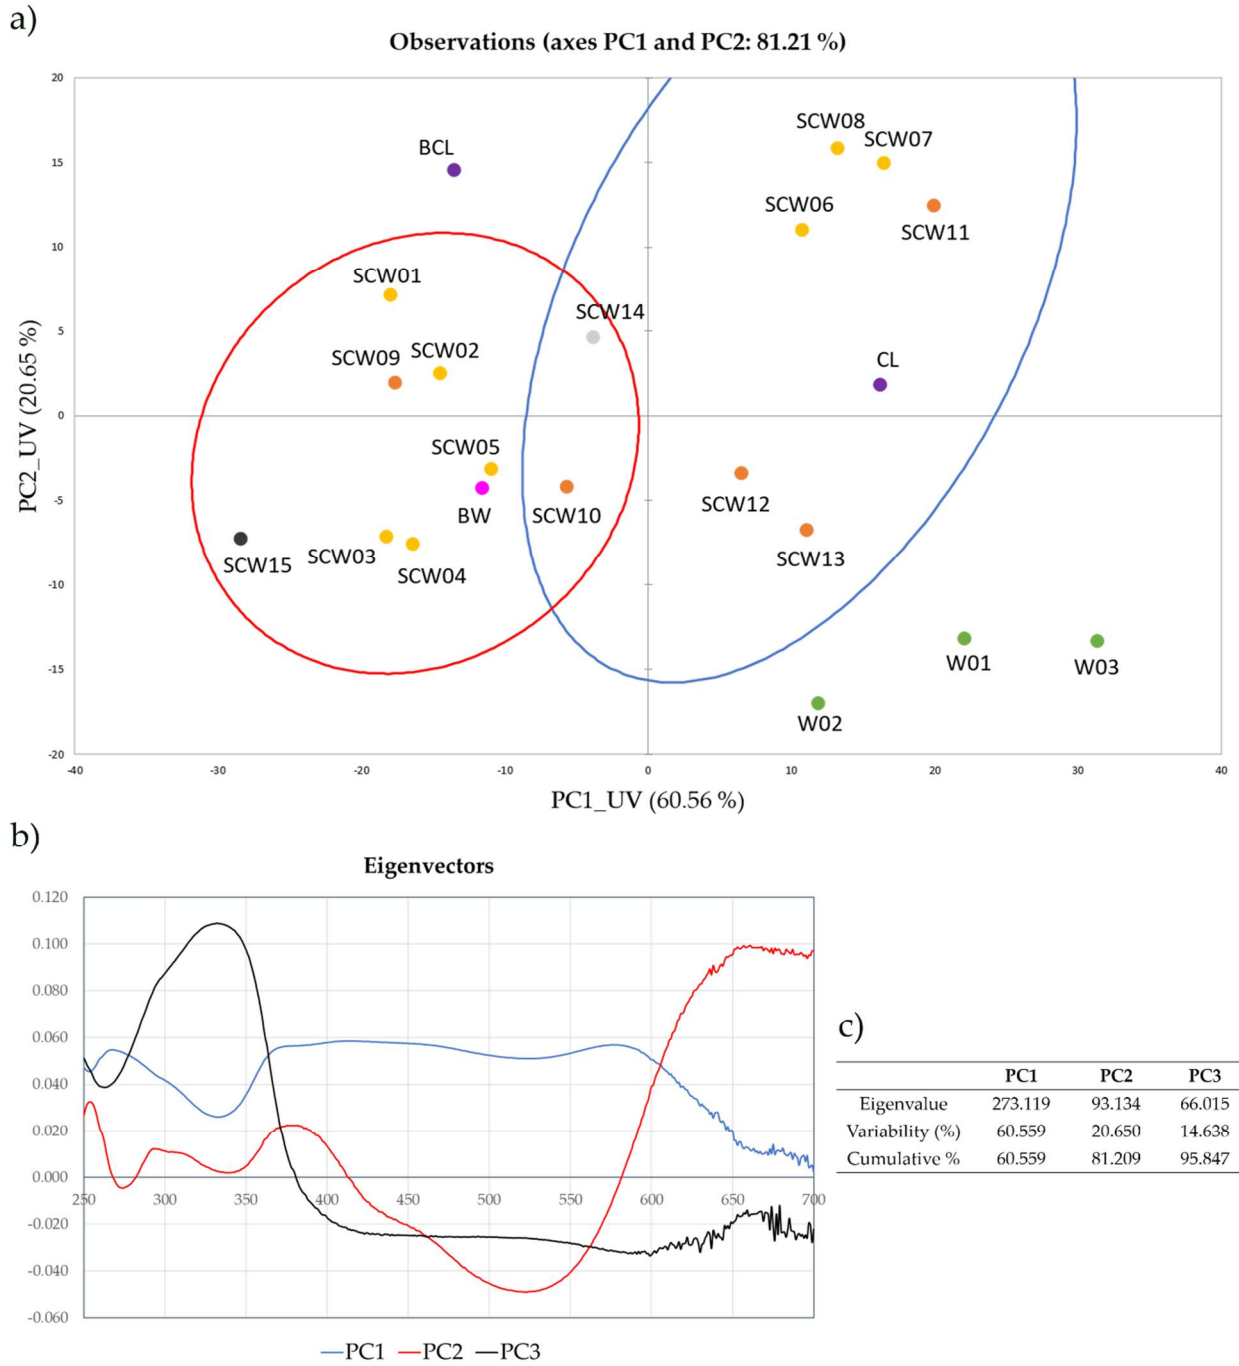

Supplement: s1 [file s1]
